# Supplementary material for: The morphology of ice and liquid brine in an environmental scanning electron microscope: a study of the freezing methods
Source: Copernicus journal article supplement (doi:10.5194/tc-13-2385-2019), 2019-09-12
Supplement: Supplementary file 1 [file tc-13-2385-2019-supplement.zip]

Archive with 3 entries (3 files):
- tc-13-2385-2019-supplement-title-page.pdf
- SI_17.pdf
- CsCl_SI_final.pdf
