# Supplementary material for: The morphology of ice and liquid brine in an environmental scanning electron microscope: a study of the freezing methods
Source: Copernicus journal article supplement (doi:10.5194/tc-13-2385-2019), 2019-09-12
Supplement: Supplementary file 1 [file tc-13-2385-2019-supplement.zip › CsCl_SI_final.pdf]

## Supplement of

# The Morphology of Ice and Liquid Brine in the Environmental SEM: A Study of the Freezing Methods

Ľubica Vetráková et al.

Correspondence to: Ľubica Vetráková ([vetrakova@isibrno.cz](mailto:vetrakova@isibrno.cz)), Dominik Heger ([hegerd@chemi.muni.cz](mailto:hegerd@chemi.muni.cz))

**Movie S1** (<https://doi.org/10.5446/39404>). The surface coverage with the brine as a function of temperature for the seeded 0.005 M sample. The temperature was first increased stepwise from  $-23.4\text{ }^{\circ}\text{C}$  to  $-12.4\text{ }^{\circ}\text{C}$  and then lowered to  $-27\text{ }^{\circ}\text{C}$ . The temperature and the elapsed time are stated in the upper left and upper right corners, respectively. The air pressure in the microscope chamber corresponded to 500 Pa during the whole sequence.

Table S1: Quantification of the size of ice crystals

| Concentration | Non-seeded samples |                      | Seeded samples |                 | Ice spheres |              |
|---------------|--------------------|----------------------|----------------|-----------------|-------------|--------------|
|               | Samples            | Ice crystals         | Samples        | Ice crystals    | Samples     | Ice crystals |
| 0.005 M       | 3                  | 28 (9, 11, 8)        | 3              | 22 (8, 5, 9)    | 1           | 8            |
| 0.05 M        | 5                  | 50 (15, 8, 8, 11, 8) | 2              | 14 (7, 7)       | 1           | 10           |
| 0.5 M         | 1                  | 13                   | 3              | 38 (12, 13, 13) | 2           | 27 (12, 15)  |

**Table S1:** The independent samples and ice crystals used to calculate the average sizes of the crystals. The number of analyzed crystals in each independent sample is given in brackets. Two perpendicular dimensions of each crystal were evaluated.

Table S2: Number of samples used for the grooves width analysis

| Concentration | Non-seeded samples |                  | Seeded samples |                 | Ice spheres |             |
|---------------|--------------------|------------------|----------------|-----------------|-------------|-------------|
|               | Samples            | Grooves          | Samples        | Grooves         | Samples     | Grooves     |
| 0.005 M       | 3                  | 15 (5, 5, 5)     | 3              | 15 (5, 5, 5)    | 2           | 10 (5, 5)   |
| 0.05 M        | 4                  | 25 (10, 5, 5, 5) | 3              | 13 (5, 5, 3)    | 2           | 20 (10, 10) |
| 0.5 M         | 0                  | 0                | 3              | 30 (10, 10, 10) | 2           | 20 (10, 10) |

**Table S2:** The independent samples and grain boundary grooves used to calculate the average width of the grooves. The number of analyzed grooves in each independent sample is given in brackets.

Table S3: Quantification of the surface coverage

|                    | Individual samples |      |      |      |      | Mean $\pm$ SE  |
|--------------------|--------------------|------|------|------|------|----------------|
| Non-seeded samples | 33.5               | 11.0 | 12.5 | 17.8 | 16.1 | $18.2 \pm 4.0$ |
| Seeded samples     | 2.7                | 3.0  | 16.7 | 8.5  | 13.8 | $9.0 \pm 2.8$  |
| Ice spheres        | 9.2                | 3.5  | 5.5  | 1.0  | 1.2  | $4.1 \pm 1.5$  |

**Table S3:** The surface coverage of the frozen samples with the CsCl brine at the beginning of the microscopic observations. The frozen samples were prepared from the 0.05 M CsCl solution. The uncertainties express standard errors of the mean (SE).

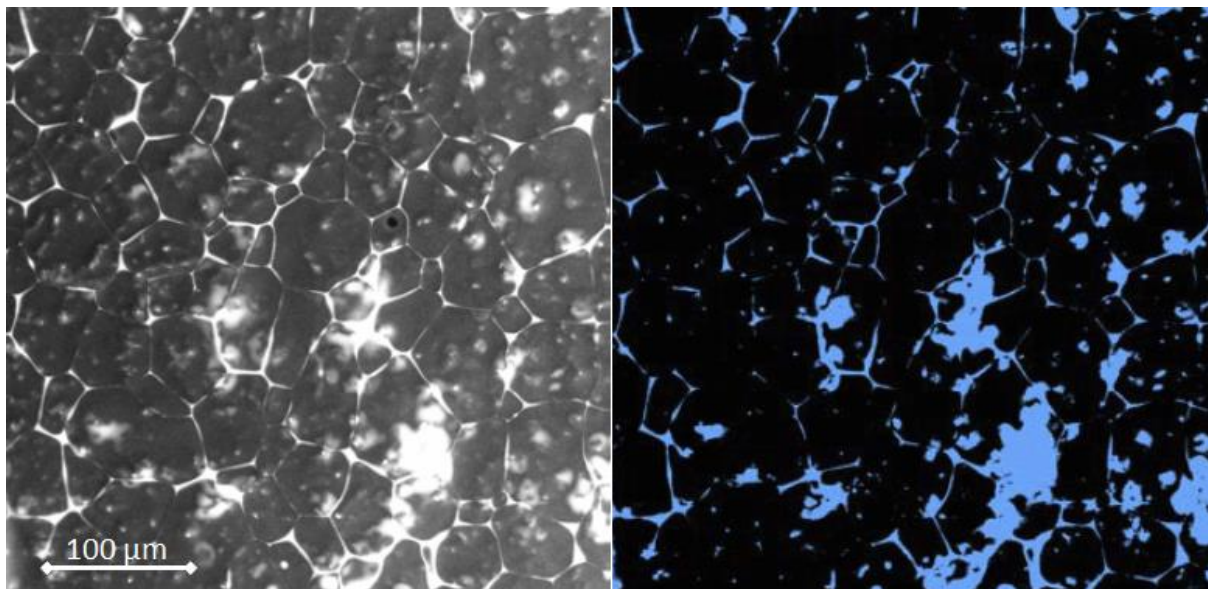

**Figure S1.** An example of estimating the ratio of the CsCl brine-covered surface. The ESEM image of the frozen sample (left) was processed by using Mountains® Software (right); the brine-containing areas on the sample surface were selected (highlighted in blue) and their relative surface area calculated by the software.

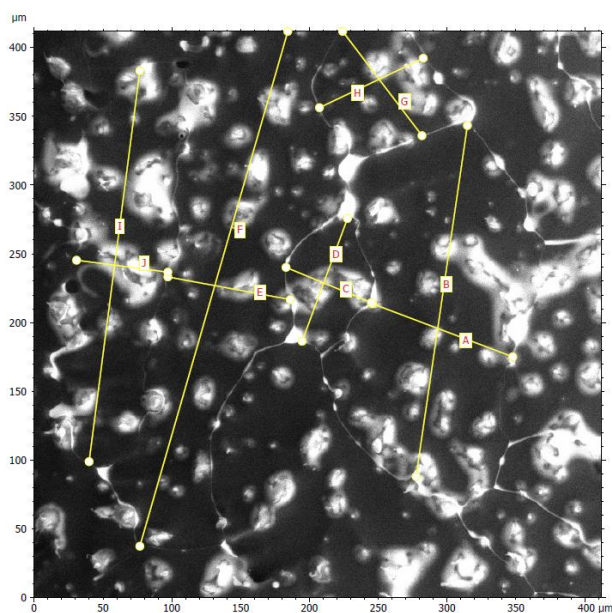

**Figure S2.** An example of estimating the average size of the ice crystals in a frozen sample. This ESEM image was recorded for the seeded sample of 0.005 M CsCl at  $-23.5^{\circ}\text{C}$ . The lengths and widths of the ice crystals were manually selected in Mountains® Software, and their sizes were automatically calculated. In several cases (the 0.005 M and 0.05 M seeded samples), the selected crystals reached beyond the image; such situations then involved evaluating the distance from the end of the crystal towards the edge of the image (distance F). The calculated values for these samples might thus be biased towards lower levels.

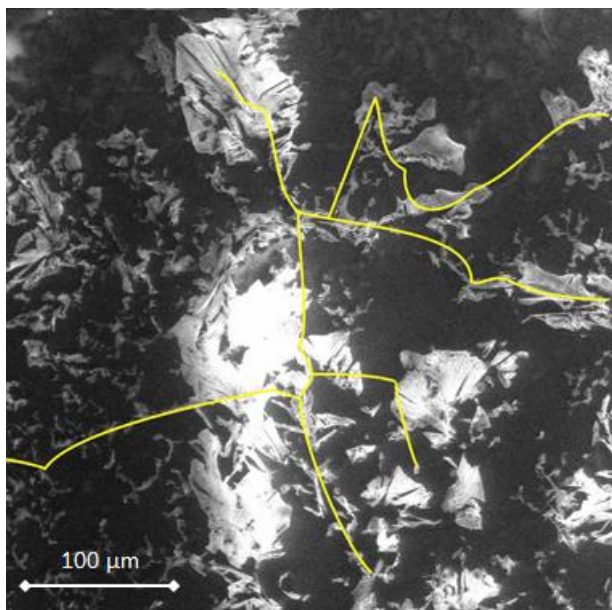

**Figure S3.** The surface of the frozen sample (0.005 M CsCl, seeded droplet) after the CsCl crystalization. This figure was designed as a combination of the panels h and i from Figure 2; the grain boundaries before the brine crystalization are highlighted in yellow, and the salt crystalization along the grain boundaries is indicated.

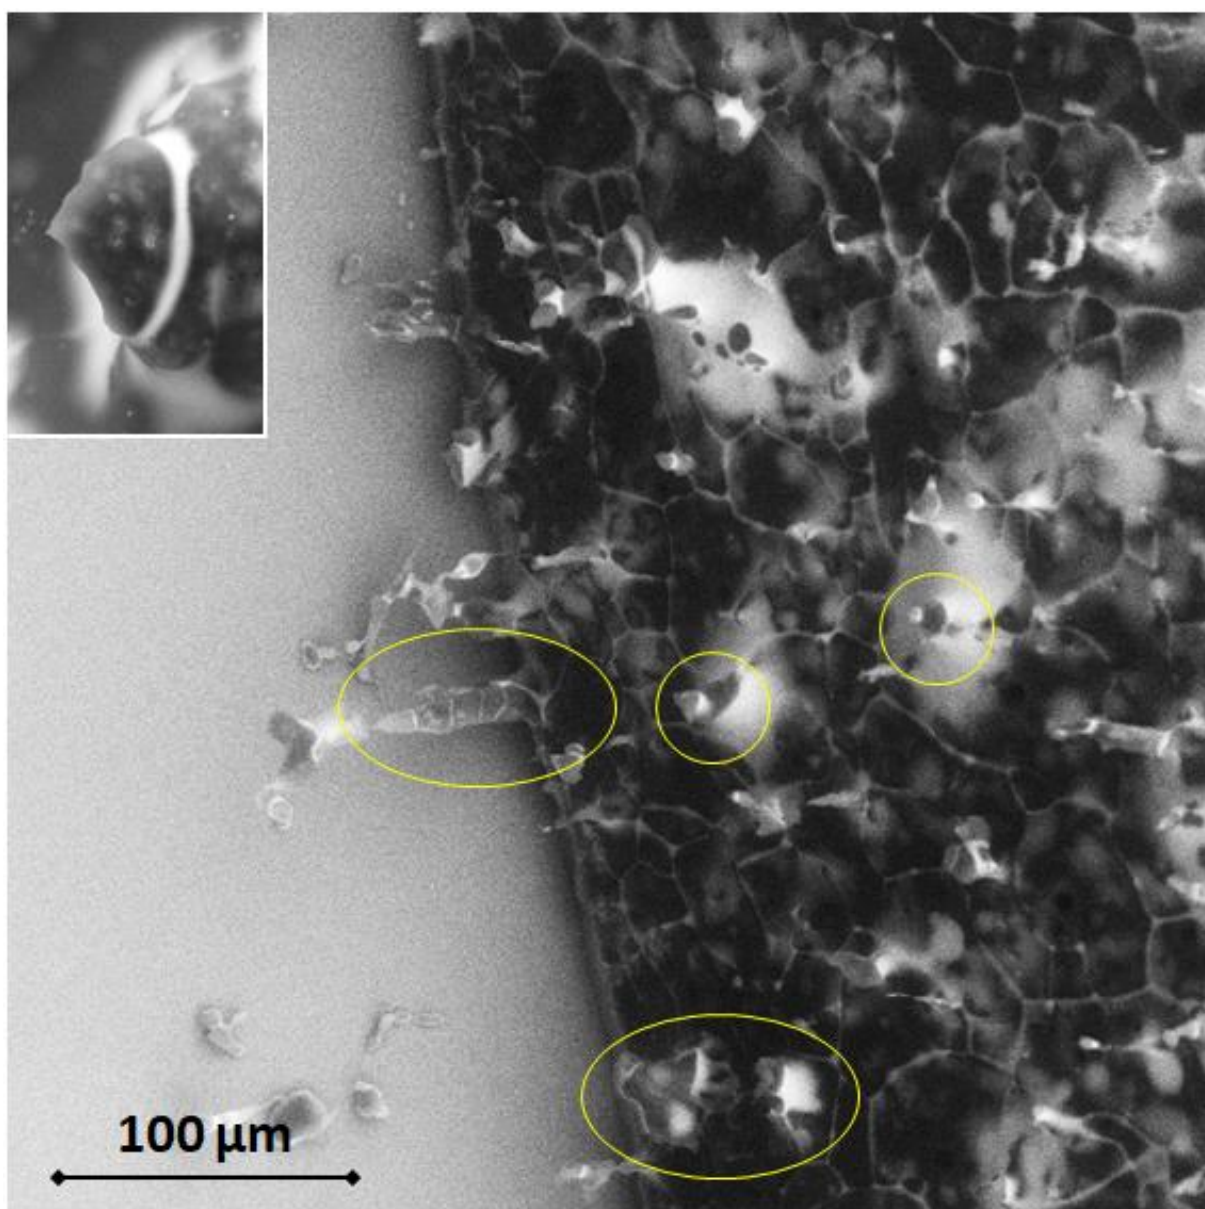

**Figure S4:** The partially sublimed non-seeded sample prepared from the 0.05 M CsCl solution. The edge of the sample is imaged via the ESEM. A few humps on the surface are highlighted, and their shapes are well visible in the image. The brine has accumulated at the bases of the humps, not on their tips. One magnified hump is represented in the upper left corner. The image was recorded at  $-21\text{ }^{\circ}\text{C}$ . The dark gray, white, and pale (on the left-hand side) areas denote the ice surface, CsCl brine, and cooling stage of the ESEM, respectively. Several particles that broke off the frozen sample are visible on the stage.

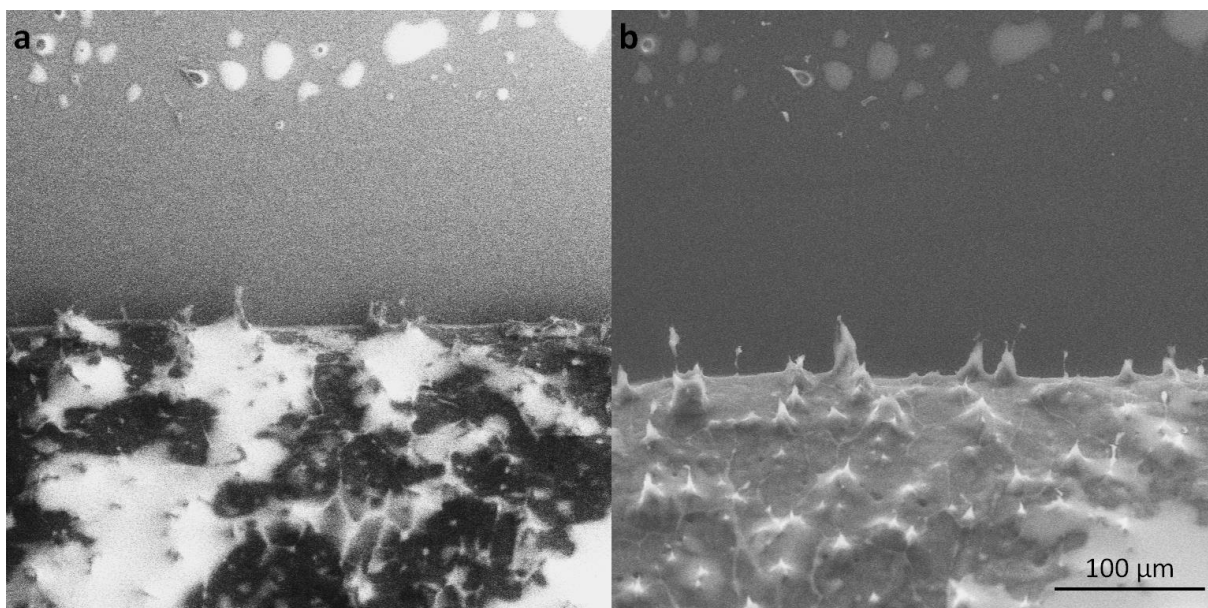

**Figure S5:** The partially sublimed non-seeded sample prepared from the 0.05 M CsCl solution. The edge of the sample is imaged via the ESEM, by using a BSE detector sensitive to atoms with large atomic numbers (a) and an ionization detector sensitive to the surface topology (b). The images were recorded at  $-22.6\text{ }^{\circ}\text{C}$ . The image from the ionization detector was produced on the same spot of the sample, 30 s after the image taken with the BSE detector.

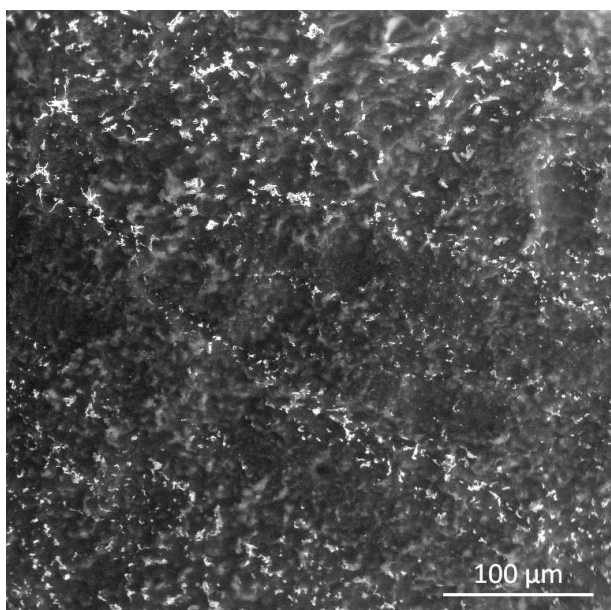

**Figure S6:** The surface of a macroscopic LN-frozen sample ( $c_{\text{CsCl}} = 0.05\text{ M}$ ) at  $-25\text{ }^{\circ}\text{C}$  observed via the ESEM. The preparation method: a droplet (diameter  $\sim 5\text{ mm}$ ) of the solution was deposited on a piece of an aluminium foil and immersed into the LN. The foil was used to ensure flat bottom of the sample for better thermal contact with the cooling stage of the ESEM. Compared to the interior of the LN-frozen sample revealed through sample fragmentation (Figures 7, S15), no parallel lines of the brine were visible on the surface of the macroscopic LN-frozen droplet.

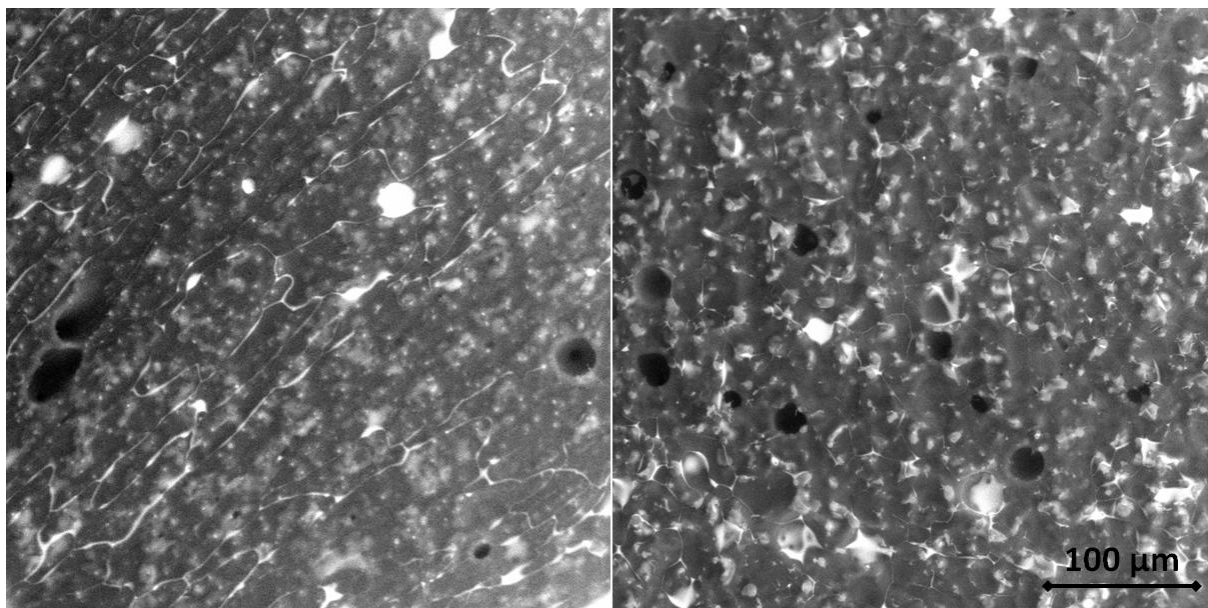

**Figure S7:** The ESEM images of two independent frozen samples prepared from the 0.005 M CsCl solution via spontaneous freezing of supercooled (non-seeded) droplets. The images were recorded at the very beginning of the observations, at  $-25^{\circ}\text{C}$ . The gray areas represent the ice, whereas the white ones denote the CsCl brine. Numerous humps and hollows are visible on the surfaces of the samples.

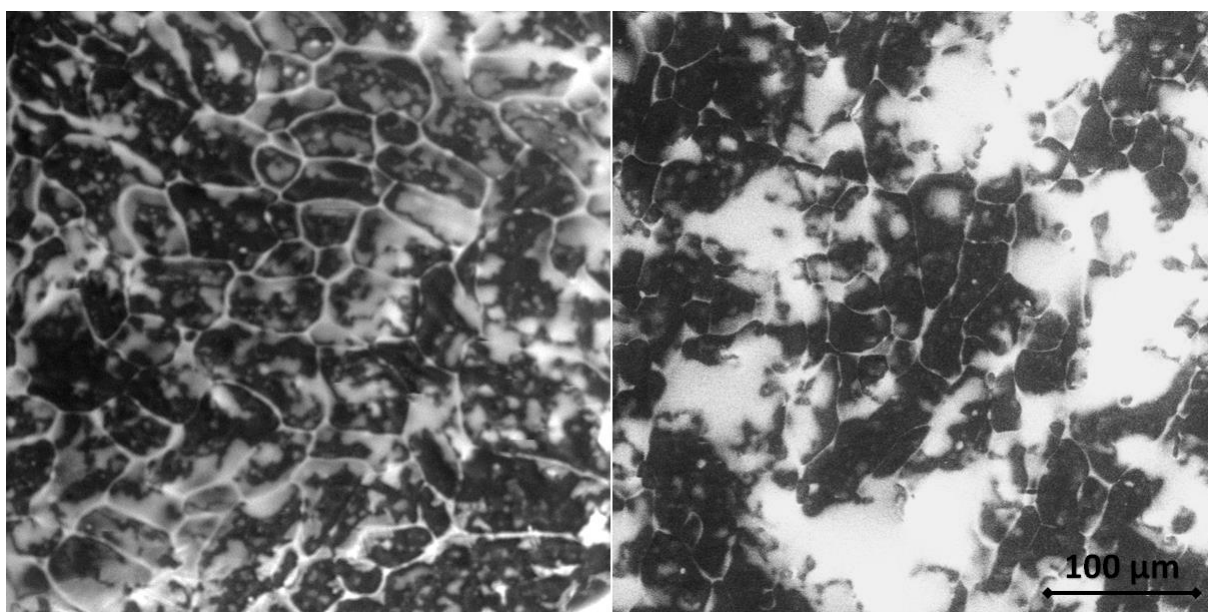

**Figure S8:** The ESEM images of two independent frozen samples prepared from the 0.05 M CsCl solution via spontaneous freezing of supercooled (non-seeded) droplets. The images were recorded at the very beginning of the observations, at  $-25^{\circ}\text{C}$  (left) or  $-22.6^{\circ}\text{C}$  (right). The gray areas represent the ice, whereas the white ones denote the CsCl brine.

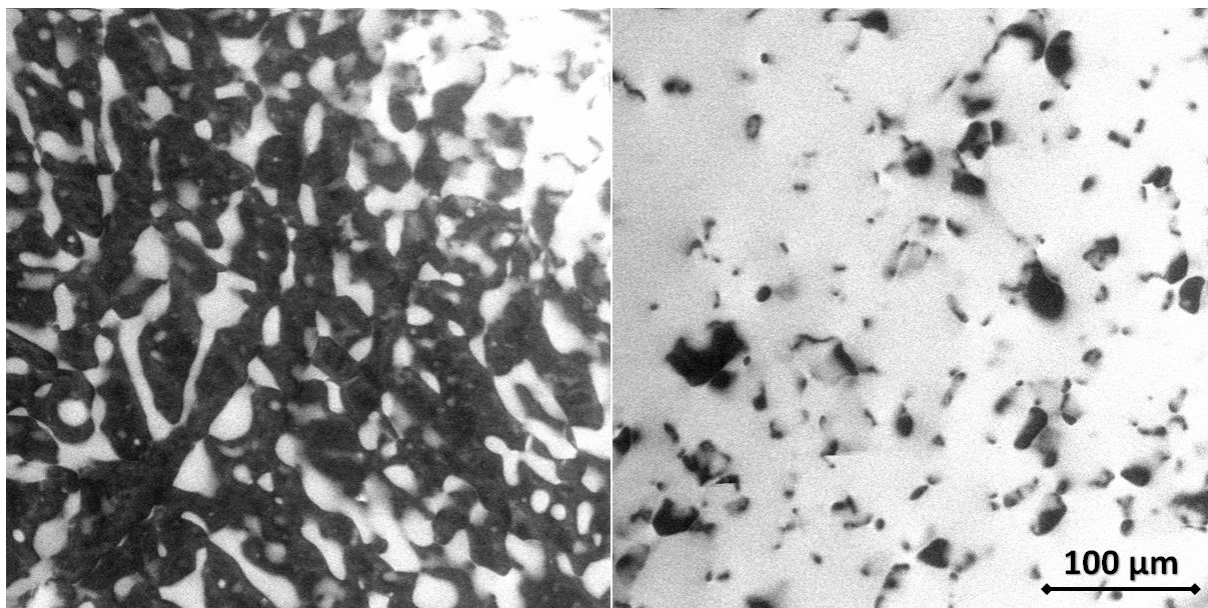

**Figure S9:** The ESEM images of two independent frozen samples prepared from the 0.5 M CsCl solution via spontaneous freezing of supercooled (non-seeded) droplets. The images were recorded at the very beginning of the observations, at  $-22\text{ }^{\circ}\text{C}$  (left) or  $-25\text{ }^{\circ}\text{C}$  (right). The gray areas represent the ice, whereas the white ones denote the CsCl brine. Numerous humps and hollows are visible on the surfaces of the samples.

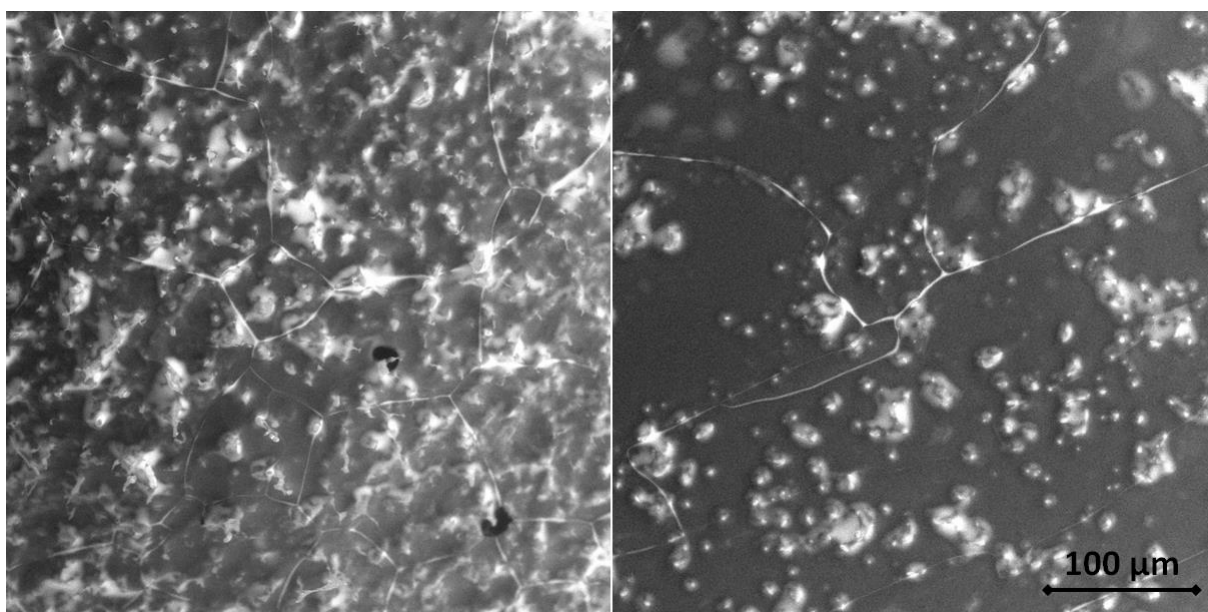

**Figure S10:** The ESEM images of two independent frozen samples prepared from the 0.005 M CsCl solution via freezing droplets seeded with ice crystals. The images were recorded at the very beginning of the observations, at  $-25\text{ }^{\circ}\text{C}$  (left) or  $-20\text{ }^{\circ}\text{C}$  (right). The gray areas represent the ice, whereas the white ones denote the CsCl brine. Numerous humps are visible on the surfaces of the samples. Two hollows are identifiable on the surface (the left panel).

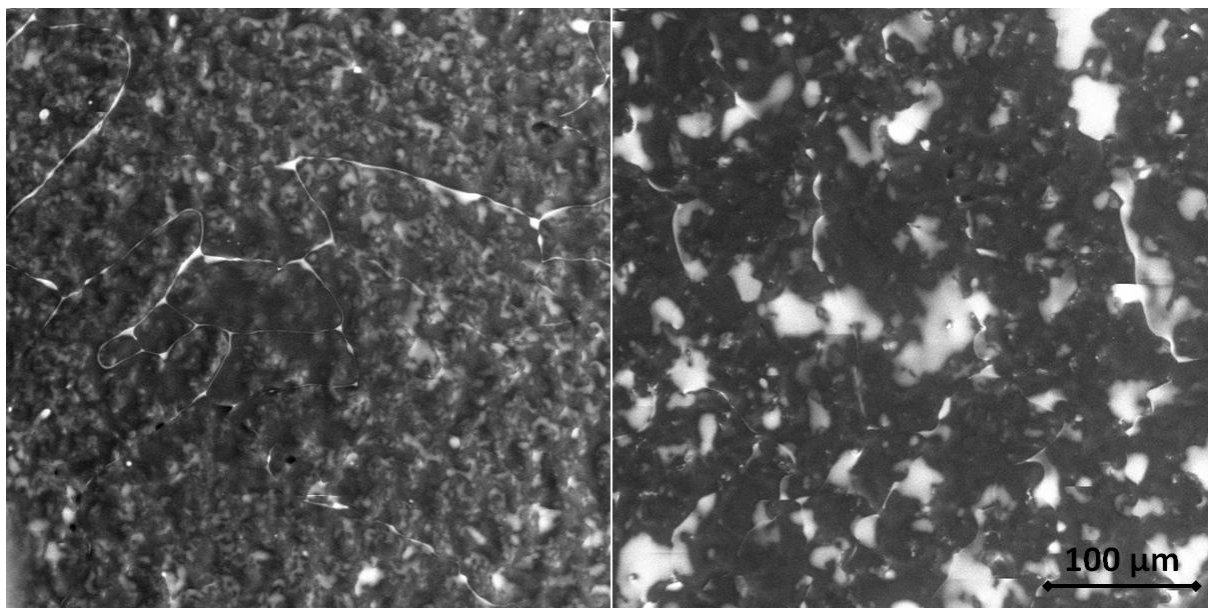

**Figure S11:** The ESEM images of two independent frozen samples prepared from the 0.05 M CsCl solution via freezing droplets seeded with ice crystals. The images were recorded at the very beginning of the observations, at  $-21\text{ }^{\circ}\text{C}$  (left) or  $-25\text{ }^{\circ}\text{C}$  (right). The gray areas represent the ice, whereas the white ones denote the CsCl brine. Numerous humps are visible on the surface of the left-hand sample.

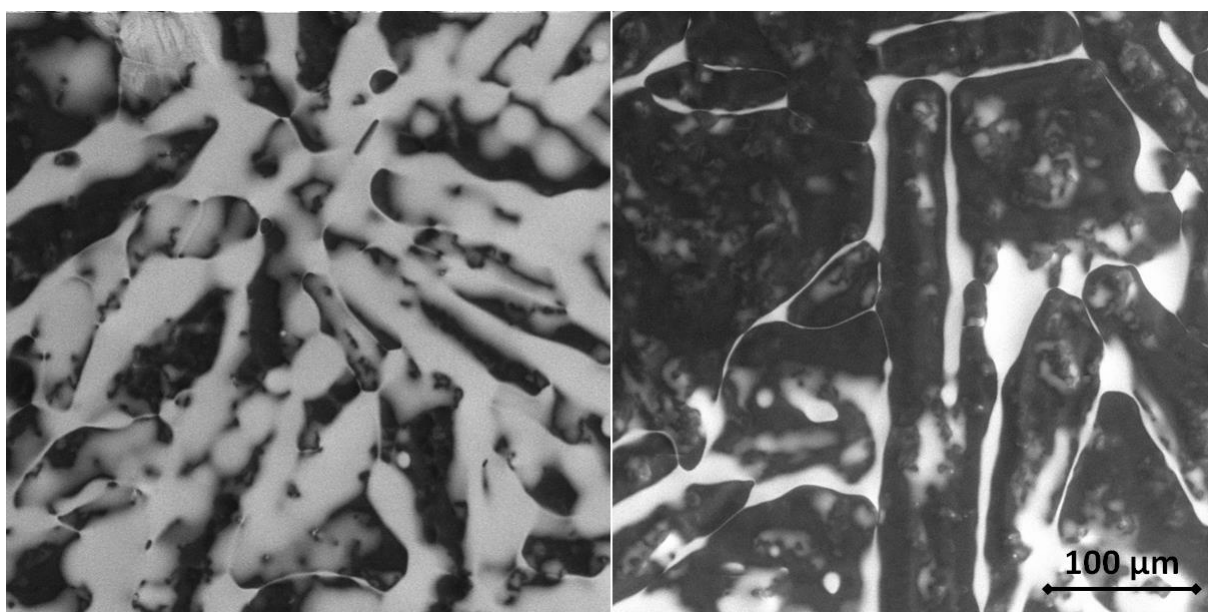

**Figure S12:** The ESEM images of two independent frozen samples prepared from the 0.5 M CsCl solution via freezing droplets seeded with ice crystals. The images were recorded at the very beginning of the observations, at  $-22.5\text{ }^{\circ}\text{C}$  (left) or  $-20\text{ }^{\circ}\text{C}$  (right). The gray areas represent the ice, whereas the white ones denote the CsCl brine.

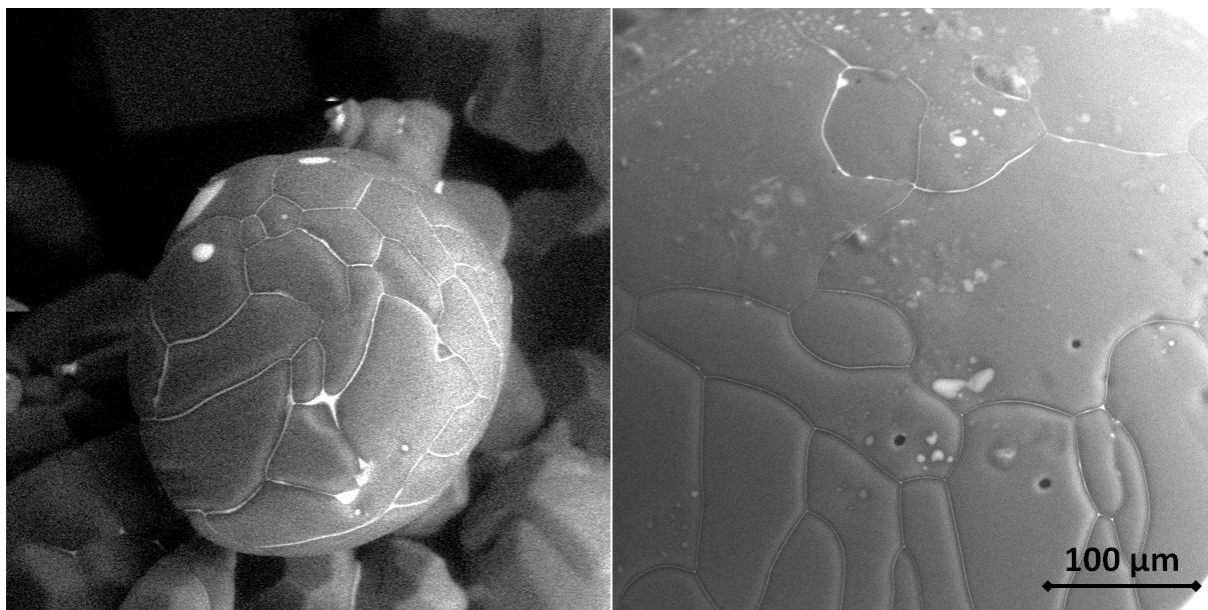

**Figure S13.** The ESEM images of the frozen samples prepared from the 0.005 M CsCl solution by spraying into the LN. The images were recorded at the very beginning of the observations, at  $-23.4^{\circ}\text{C}$  (left) or  $-21.8^{\circ}\text{C}$  (right). The gray areas represent the ice, whereas the white ones denote the CsCl brine.

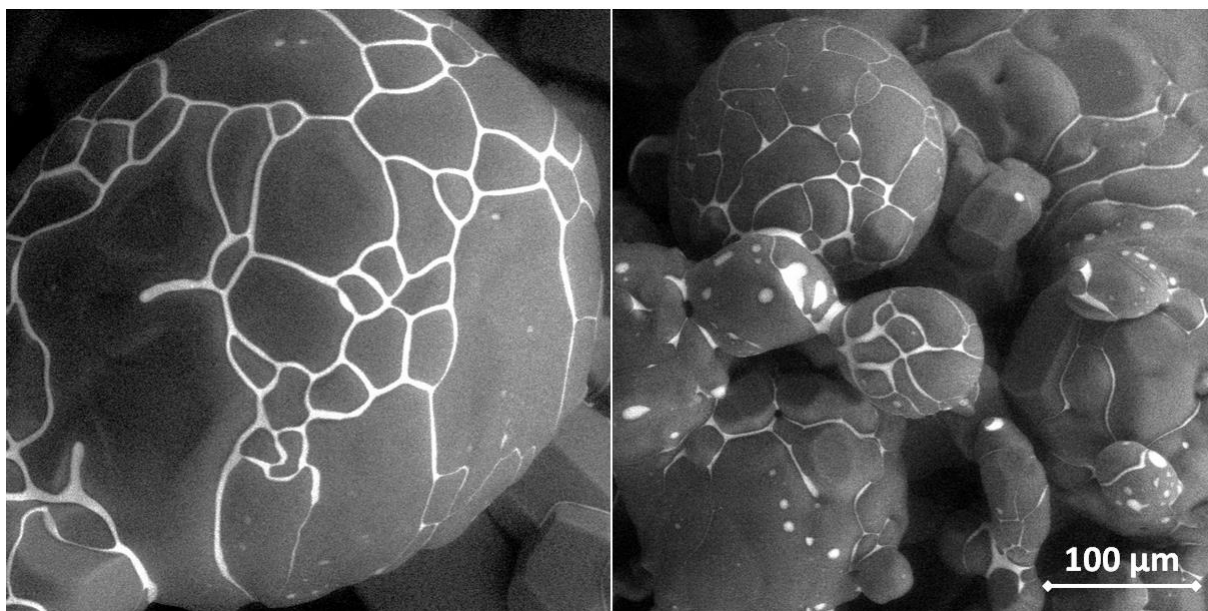

**Figure S14.** The ESEM images of the frozen samples prepared from the 0.05 M CsCl solution by spraying into the LN. The images were recorded at the very beginning of the observations, at  $-22^{\circ}\text{C}$  (left) or  $-22.5^{\circ}\text{C}$  (right). The gray areas represent the ice, and the white ones denote the CsCl brine.

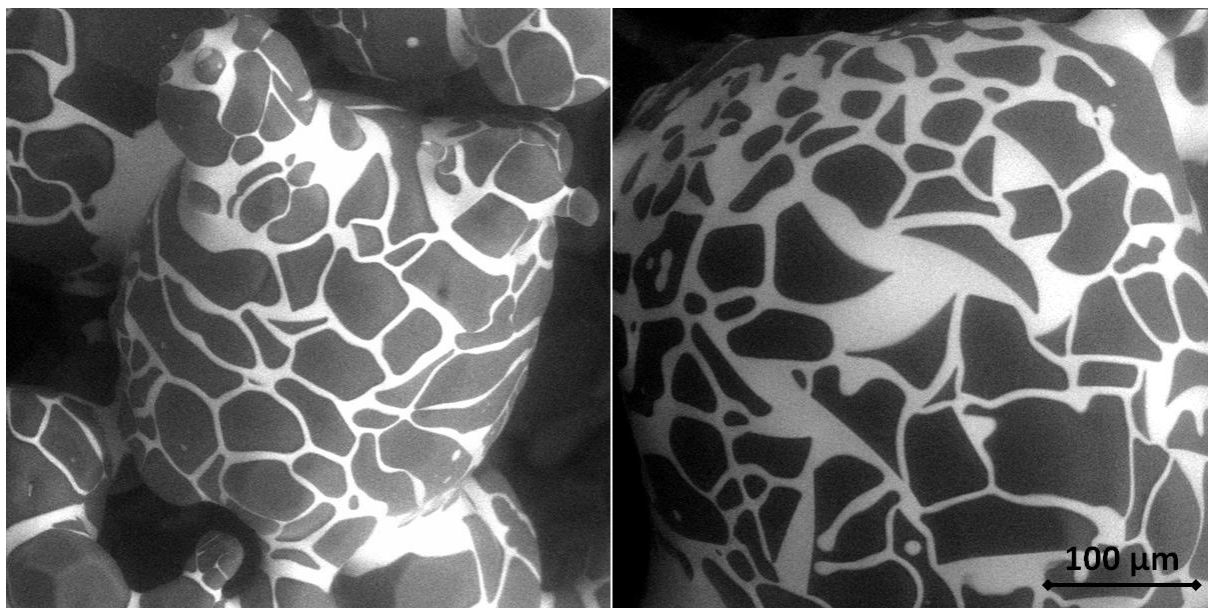

**Figure S15.** The ESEM images of the frozen samples prepared from the 0.5 M CsCl solution by spraying into the LN. The images were recorded at the very beginning of the observations, at  $-23.5^{\circ}\text{C}$ . The gray areas represent the ice, and the white ones denote the CsCl brine.

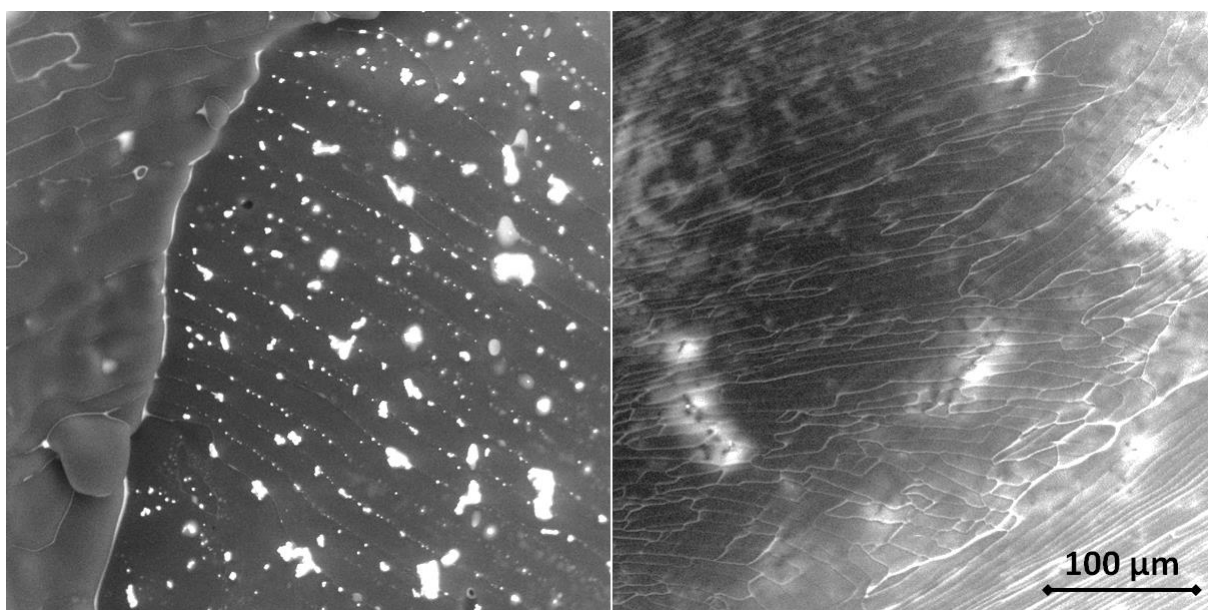

**Figure S16:** The ESEM images of the interior of the fragmentized LN-frozen samples of 0.05 M (left) and 0.005 M (right) CsCl. The images were recorded at the very beginning of the observations, at  $-25^{\circ}\text{C}$  (left) or  $-22.5^{\circ}\text{C}$  (right). The gray areas represent the ice, and the white ones denote the CsCl brine.

**Figure S17 (enclosed as independent document):** The ESEM images utilized in the measurements of the grain boundary groove thicknesses. The average values are summarized in Table 2.

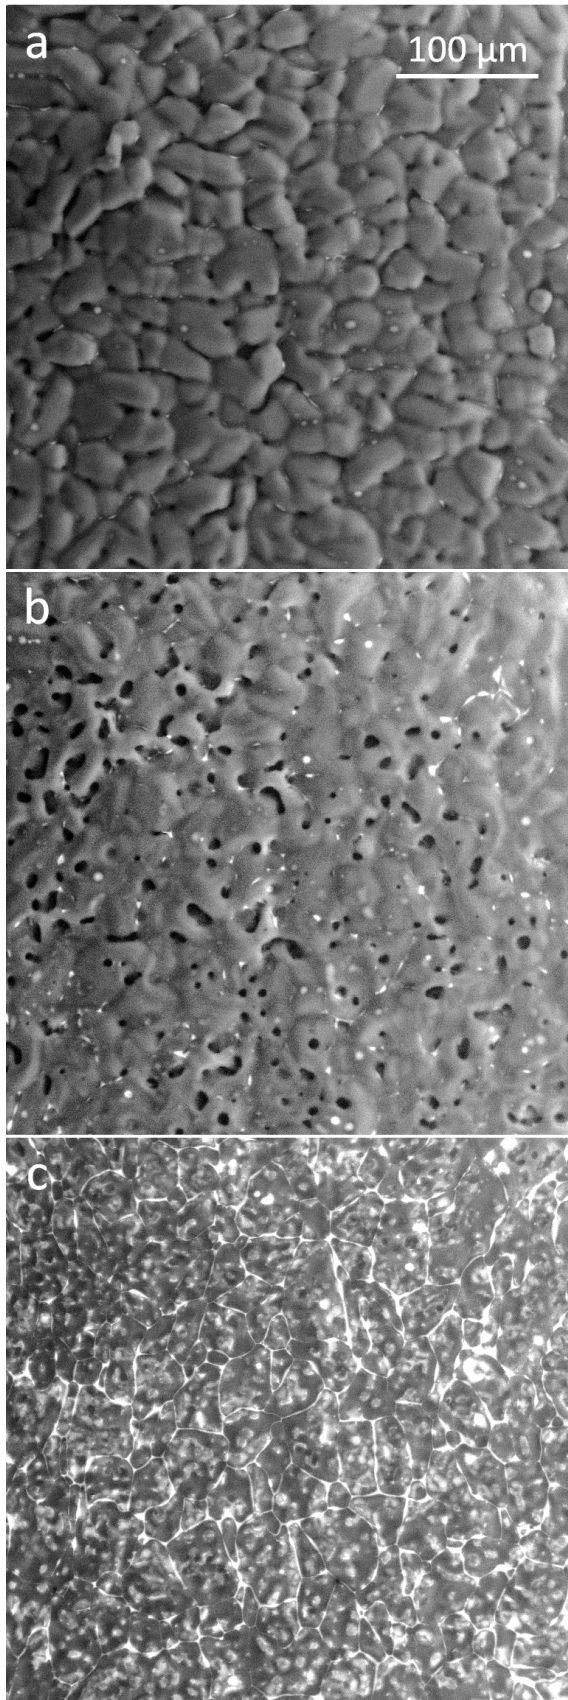

**Figure S18:** The gradual sublimation of deposited ice from the surface of the frozen sample. The structure of the ice is visible in panel (a). Partial sublimation results in a porous layer of ice on the surface of the frozen sample (b). After all the deposited ice has sublimated, the surface of the sample is revealed (c). The surface is not porous but compact; the sample structure is very different from that of the deposited ice. It is thus possible to distinguish the sample surface from the deposited ice while imaging with the ESEM.

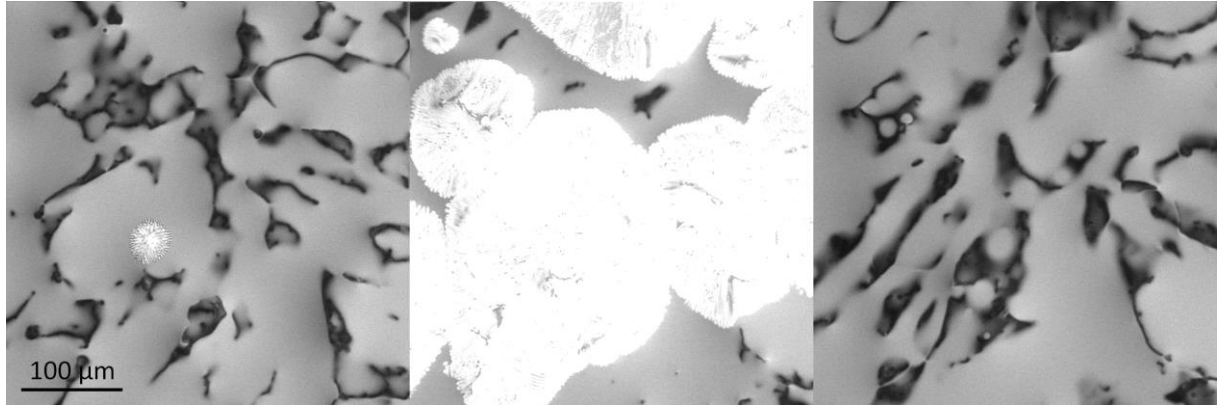

**Figure S19:** The crystallization of the salt from the brine, and its subsequent melting upon temperature rise above  $T_{eu}$ . These images were recorded for the 0.5 M CsCl solution frozen via seeding.

### Calculating the relative amount of the salt on the surface of the frozen sample

#### *Parameters used for the calculation*

$$c_{CsCl} = 0.05 \text{ M } (m_{aq} \approx 0.05 \text{ mol/kg})$$

$t_{sample} = -21 \text{ }^{\circ}\text{C}$  (temperature of the sample is about  $2 \text{ }^{\circ}\text{C}$  higher than that of the cooling stage); at this temperature, the brine molality in the frozen sample ( $m_{fr}$ ) assessed from the phase diagram is  $7.25 \text{ mol/kg}$ . The mass fraction of the brine ( $w_{brine}$ ) in the frozen sample calculated from the phase diagram using the lever rule is

$$w_{brine} = \frac{m_{aq}}{m_{fr} - m_{aq}} = \frac{0.05}{7.25 - 0.05} = 6.9 \times 10^{-3}.$$

We postulate the thickness of the brine layer on the surface to be:  $d = 1.5 \text{ } \mu\text{m}$

Surface coverage (SC) found from the micrographs:

- 18% for the non-seeded sample
- 9% for the seeded sample
- 4% for the ice sphere

#### Estimated external surface area and volume of a (non-seeded, seeded) droplet:

The average diameter of the droplet was  $4 \text{ mm}$ , the height was  $\sim 1 \text{ mm}$  (based on the working distance of the ESEM). The shape of the droplet was approximated by a spherical cap cut off from a sphere with the diameter of  $5 \text{ mm}$  (Figure S20).

$$V = 6.81 \text{ mm}^3$$

$$S = 15.7 \text{ mm}^2$$

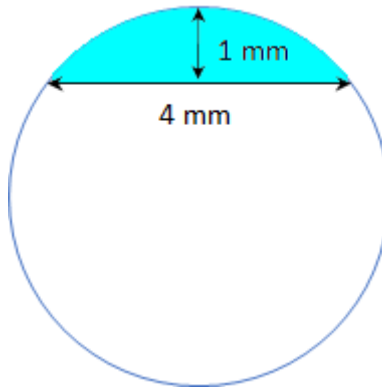

**Figure S20:** The shape of the droplet approximated by using a spherical cap (light blue) cut off from a sphere with the diameter of 5 mm.

**Surface and volume of an ice sphere with the diameter of 200  $\mu\text{m}$ :**

$$V = 4.19 \times 10^{-3} \text{ mm}^3$$

$$S = 0.126 \text{ mm}^2$$

Volume of the brine on the surface:  $V_s = SC \times S \times d$

Total volume of the brine:  $V_t = w_{\text{brine}} \times V$

Relative amount of the brine on the surface =  $V_s / V_t$

|                   | $V_s / \text{mm}^3$  | $V_t / \text{mm}^3$  | $V_s / V_t$ |
|-------------------|----------------------|----------------------|-------------|
| Non-seeded sample | $4.2 \times 10^{-3}$ | $4.7 \times 10^{-2}$ | <b>9%</b>   |
| Seeded sample     | $2.1 \times 10^{-3}$ | $4.7 \times 10^{-2}$ | <b>4.5%</b> |
| Ice sphere        | $7.5 \times 10^{-6}$ | $2.9 \times 10^{-5}$ | <b>26%</b>  |

**Table S4:** The estimated relative amounts of the brine on the surface of the frozen samples prepared from 0.05 M CsCl solution. The values were calculated assuming the thickness of the surface brine is 1.5  $\mu\text{m}$ . The detailed calculation is provided above.
