# Supplementary material for: The morphology of ice and liquid brine in an environmental scanning electron microscope: a study of the freezing methods
Source: Copernicus journal article supplement (doi:10.5194/tc-13-2385-2019), 2019-09-12
Supplement: Supplementary file 1 [file tc-13-2385-2019-supplement.zip › tc-13-2385-2019-supplement-title-page.pdf]

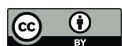

## *Supplement of*

# **The morphology of ice and liquid brine in an environmental scanning electron microscope: a study of the freezing methods**

**L'ubica Vetrá et al.**

*Correspondence to:* L'ubica Vetráková ([vetrakova@isibrno.cz](mailto:vetrakova@isibrno.cz)) and Dominik Heger ([hegerd@chemi.muni.cz](mailto:hegerd@chemi.muni.cz))

- [tc-13-2385-2019-supplement-title-page.pdf](#)
- [CsCl\\_SI\\_final.pdf](#)
- [SI\\_17.pdf](#)

The copyright of individual parts of the supplement might differ from the CC BY 4.0 License.
